# Supplementary material for: Preserving extracellular space for high-quality optical and ultrastructural studies of whole mammalian brains
Source: PubMed Central journal article supplement — Cell Rep Methods. 2023 Jul 5;3(7):100520. doi: 10.1016/j.crmeth.2023.100520 (PMC10391564; doi:10.1016/j.crmeth.2023.100520), 2023-07-05
Supplement: mmc1.pdf [file mmc1.pdf]

**Cell Reports Methods, Volume 3**

**Supplemental information**

**Preserving extracellular space for high-quality  
optical and ultrastructural studies  
of whole mammalian brains**

**Xiaotang Lu, Xiaomeng Han, Yaron Meirovitch, Evelina Sjöstedt, Richard L. Schalek, and Jeff W. Lichtman**

## Supplemental Information

**Table S1. List of immunoprobes and dilution ratios, related to Figure 3 and the STAR Methods.**

| <b>Name of immunoprobes</b> | <b>Manufacturer and catalog number</b> | <b>Dilution</b> |
|-----------------------------|----------------------------------------|-----------------|
| NeuN                        | Abcam, ab190195                        | 1:100           |
| GFP, A647                   | Invitrogen, A31852                     | 1:100           |
| PV                          | Abcam, ab11427                         | 1:250           |
| SST                         | Millipore Sigma, MAB 354               | 1:50            |
| CR                          | Sigma-Aldrich, C7479                   | 1:50            |
| PSD-95                      | Antibodies Incorporated, 75-028        | 1:200           |
| Anti-rat Fab2 A488          | Jackson ImmunoResearch, 712-546-150    | 1:100           |
| Anti-rabbit Fab2 A594       | Jackson ImmunoResearch, 711-586-152    | 1:100           |
| Anti-mouse IgG2a A488       | ThermoFisher, A-21131                  | 1:100           |
| biotinylated WFA            | Adipogen, VC-B-1355-M002               | 1:5000          |
| Streptavidin A488           | ThermoFisher Scientific, S11223        | 1:1000          |

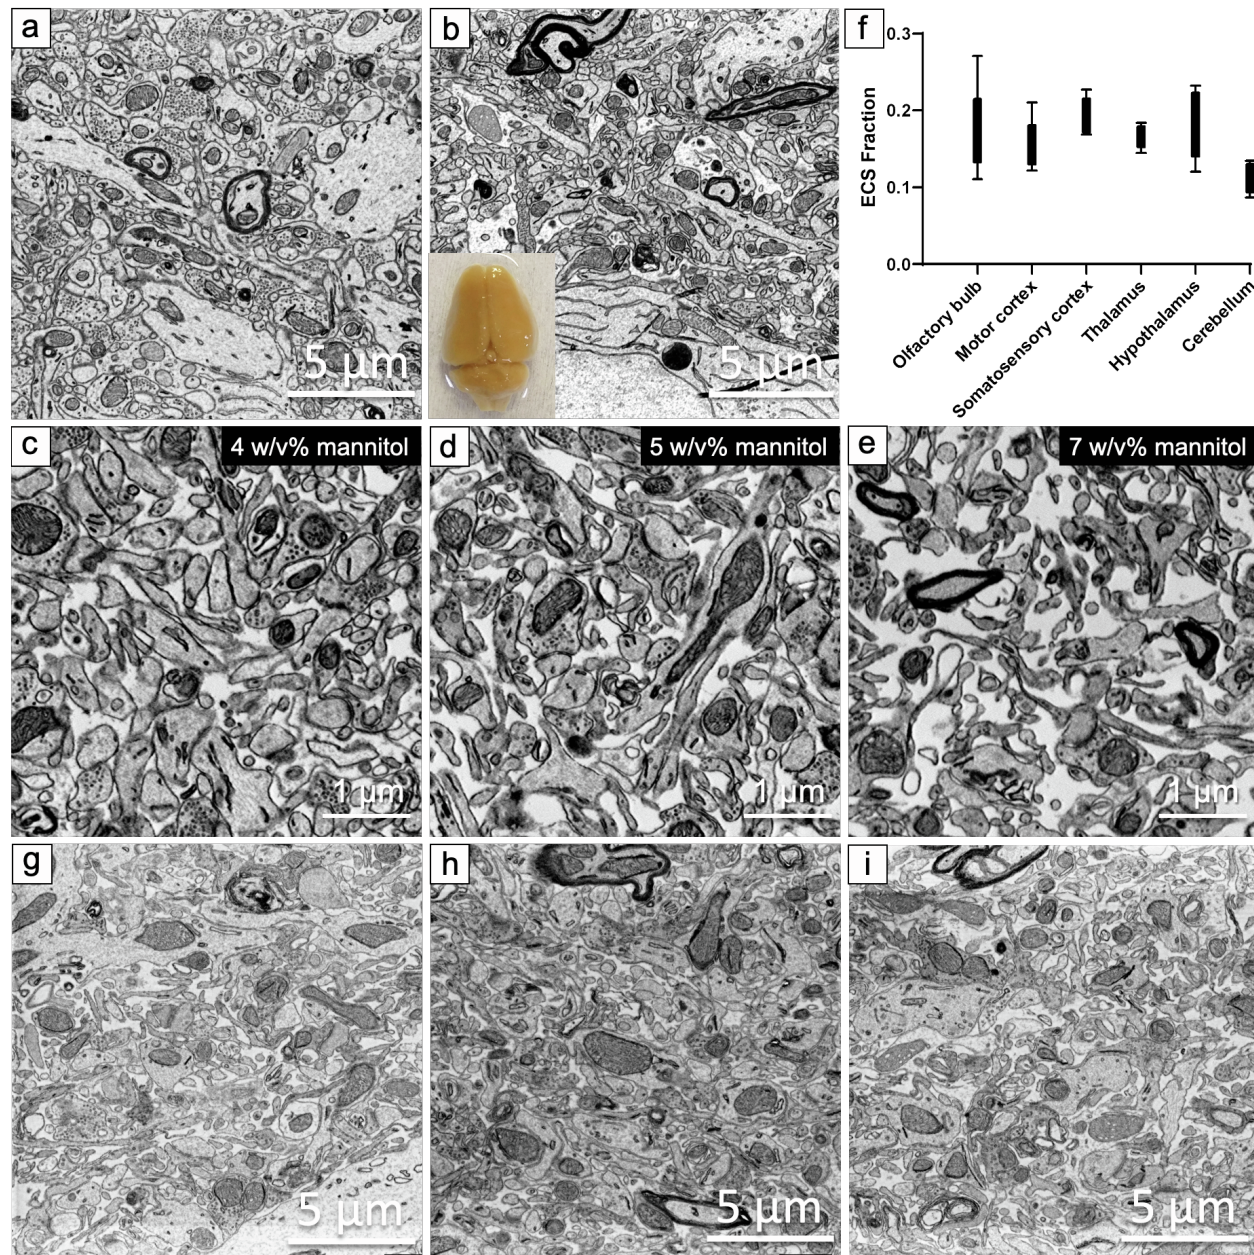

**Figure S1: Parameter optimization for the ECS-preserved perfusion method, related to Figure 1.** (a) When mannitol-added fixative was perfused after blood clearing (i.e., two-step perfusion), very little ECS was observed in the cortex. (b) When mannitol-added fixative was infused immediately after the opening of the BBB with a 15 w/v% mannitol in aCSF (i.e., three-step perfusion), no ECS was preserved in the cortical samples. (inset) The brain also showed an obvious volume shrinkage. (c-e) EM images were obtained in the center of 500  $\mu\text{m}$ -thick brain slices that were incubated in a mannitol-containing aCSF and then transferred to a mannitol-containing fixative to determine the optimal mannitol concentration for ECS preservation: (c) 4 w/v% mannitol; (d) 5 w/v% mannitol; (e) 7 w/v% mannitol. (f) The ECS fraction in the perfusion-fixed mouse brain was measured in several brain regions of three different mouse brains. The olfactory bulb had an ECS fraction of  $16.3 \pm 6.9\%$ , the motor cortex had  $16.9 \pm 3.1\%$ , the somatosensory cortex had  $17.3 \pm 2.7\%$ , the thalamus had  $16.8 \pm 1.6\%$ , the hypothalamus had  $18.7 \pm 4.7\%$ , and the cerebellum had  $10.7 \pm 2.0\%$ . (g-i) EM images of the mouse brain cortices from three preparations showed that ECS was preserved in different samples using the mannitol-assisted four-step perfusion method.



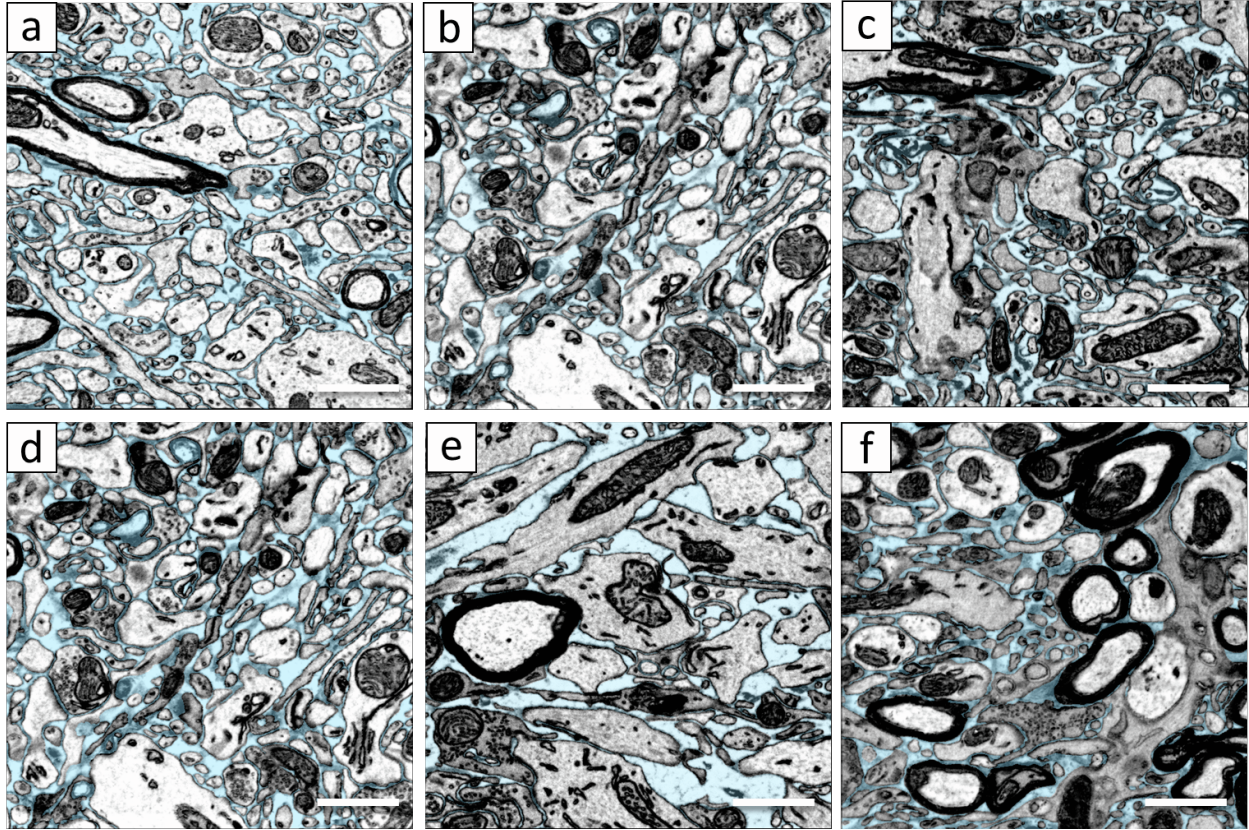

**Figure S2: ECS was also preserved in rat brains using the four-step perfusion, related to Figure 1.** EM images were taken from (a) motor cortex, (b) somatosensory cortex, (c) visual cortex, (d) olfactory bulb, (e) hippocampus, and (f) thalamus. Scale bars: 1  $\mu\text{m}$ .



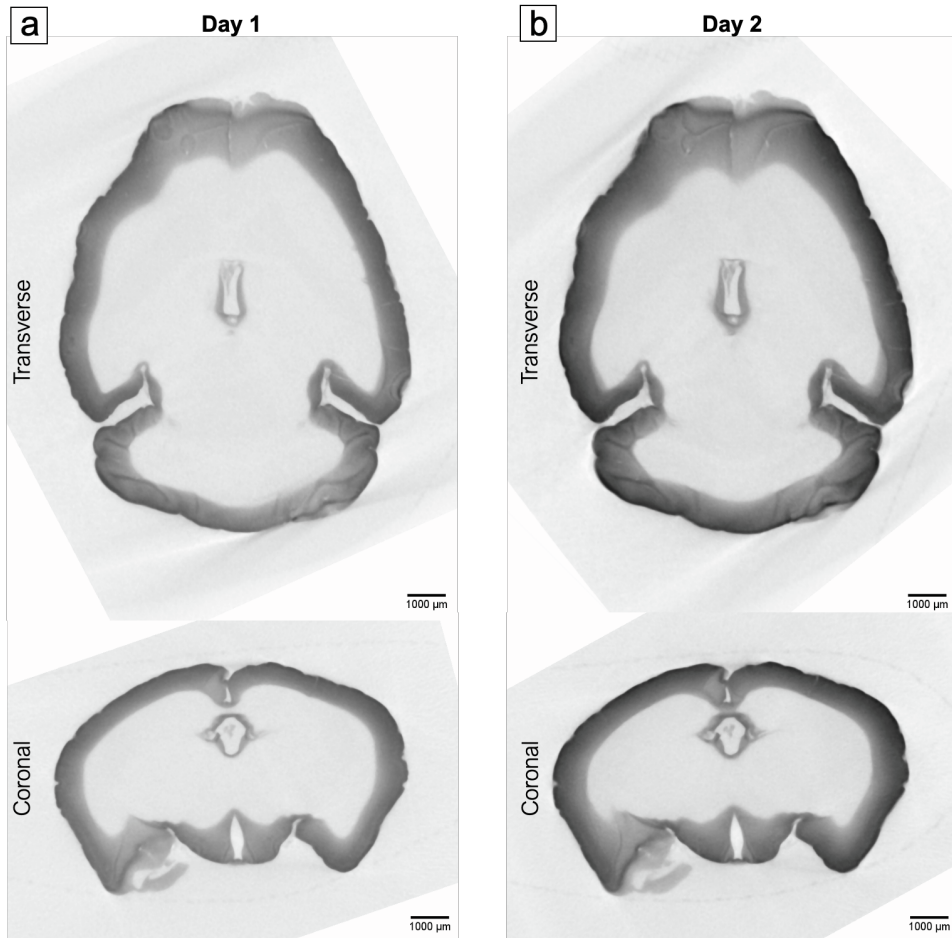

**Figure S3: ROTO cannot be applied to whole brain staining, related to Figure 2.** Ferrocyanide reduced osmium was applied on whole mouse brains that were fixed with ECS preservation, after one day (a) and two days (b) at room temperature. The results showed that the reduced osmium could penetrate up to 800  $\mu\text{m}$  from the pia but did not progress further after 2 days. This finding suggests that the ROTO protocol is not suitable for whole mouse brain preparation due to its limited penetration depth.

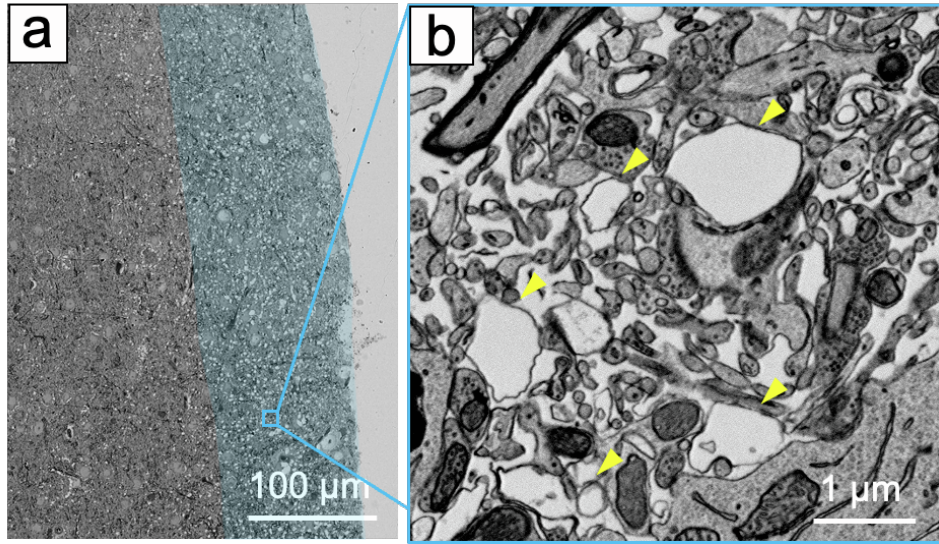

**Figure S4: Vibratoming artifacts on unfixed brain tissues, related to Figure 3.** (a) Vibratoming of acute brain slices can generate artifacts in the superficial part of the vibratome section (e.g., vacuolar structures in the blue-shaded region). (b) A higher magnification electron micrograph of empty vacuoles from the blue-shaded region in panel b (yellow arrows). Brain slices from transcardially fixed samples did not show this artifact.
